# Supplementary material for: Impact of a homegardening intervention on crop diversity: Results from a cluster-randomized trial in Bangladesh
Source: Research Square preprint supplement (doi:10.21203/rs.3.rs-5320436/v1), 2024-11-04
Supplement: Supplementary file 1 [file 7f1535d688b8f40a949e1caa.xlsx]

## Sheet: AC croplist
Annex C: List of crop species and proportion of households who harvested these crops over the seasons of the FAARM trial
Year												2016										2018										2021
										2014/2015						2017												2019
English species name	Alternative English name(s)	Scientific species name	Transliterated Bengali			Promoted		Seasons harvested		Baseline		Hot		Rainy		Winter		Hot		Rainy		Winter		Hot		Rainy		Winter		Hot		Hot**
				type	index		Winter	Hot	Rainy	Grew	Harv.	Con	Int	Con	Int	Con	Int	Con	Int	Con	Int	Con	Int	Con	Int	Con	Int	Con	Int	Con	Int	Con	Int
Vegetables				0.5	1
Ash Gourd	Wax Gourd	Benincasa hispida (Thunb.) Cogn.	Chal Kumra	1	1	X		X	X	0.382612	0.003	0.317765	0.483682	0.239936	0.3958			0.335314	0.477702	0.302521	0.525652	0.0603521	0.199667	0.288494	0.579686	0.277491	0.602705			0.334817	0.510345	0.400576	0.554667
Asiatic Pennywort		Centella asiatica (L.) Urb.	Tankuni Shak, Tuni Mankuni	1	1				X	0.0114899				0.010467	0.0242326					0.0445378	0.226241	0.185247	0.447587			0.0756014	0.262046
Bitter Gourd		Momordica charantia L.	Korola	1	1	X	X	X	X	0.0210647	0.0145538	0.0225188	0.262762	0.0177134	0.196284	0.0105263	0.0513029	0.0144312	0.246141	0.010084	0.238015	0.003	0.0657238	0.0135364	0.190751	0.0137457	0.153846	0.0146552	0.0505137	0.0204809	0.113793	0.0576369	0.130667
Bottle Gourd	Calabash	Lagenaria siceraria (Molina) Standl.	Lao	1	1	X	X	X	X	0.586748	0.456147	0.225188	0.403347	0.230274	0.421648	0.351417	0.57899	0.0483871	0.16295	0.0882353	0.241379	0.357083	0.634775	0.165821	0.34104	0.102234	0.20541	0.297414	0.511986	0.0872663	0.193966	0.224784	0.36
Buffalo Spinach		Enydra fluctuans Lour.	Helencha Shak	1	1		X		X					0.002	0.006	0.005	0.0285016			0.0109244	0.0765349	0.0234702	0.181364			0.0146048	0.0997464	0.008	0.0505137
Cabbage		Brassica oleracea var. capitata L.	Badha Kopi	1	1	X	X			0.0111069	0.008					0.0129555	0.149023					0.0100587	0.185524					0.006	0.0239726
Carrot		Daucus carota L.	Gajar	1	1	X	X			0.0122558	0.009					0.002	0.0732899					0.004	0.18386					0.002	0.0231164
Cauliflower		Brassica oleracea var. botrytis L.	Fulkopi	1	1	X	X			0.0145538	0.0111069					0.0145749	0.0618892					0.0117351	0.171381					0.0103448	0.0368151
Cucumber		Cucumis sativus L.	Shosha, Kira	1	1		X	X	X	0.123707	0.0608962	0.0133445	0.0317992	0.0152979	0.0290792	0.0105263	0.0276873	0.024618	0.0634648	0.0243697	0.0714886	0.0100587	0.0507488	0.0473773	0.118084	0.0206186	0.0701606	0.0137931	0.0410959	0.0293856	0.0715517	0.054755	0.104
Eggplant	Brinjal, Aubergine	Solanum melongena L.	Begun	1	1	X	X	X	X	0.344313	0.286863	0.06005	0.164017	0.0805153	0.180937	0.14251	0.337948	0.0636672	0.167238	0.0621849	0.194281	0.144174	0.426789	0.126058	0.420314	0.0781787	0.250211	0.176724	0.364726	0.123776	0.268103	0.210375	0.36
French Bean	Field Bean	Phaseolus vulgaris L.	Jhar Sim	1	1		X									0	0.007					0.003	0.0174709					0.0439655	0.0667808
Green Amaranth	Stem Amaranth	Amaranthus dubius Mart. ex Thell.	Data/Dugi Shak	1	1	X	X	X	X	0.613941	0.51666	0.273561	0.533891	0.223833	0.462036	0.234008	0.557003	0.24618	0.482847	0.198319	0.46762	0.207879	0.689684	0.358714	0.673823	0.169244	0.392223	0.162931	0.385274	0.384684	0.603448	0.570605	0.688
Hyacinth Bean	Country Bean, Indian Bean	Lablab purpureus (L.) Sweet	Sim, Uri	1	1		X			0.765224	0.695519					0.557895	0.690554					0.459346	0.672213					0.514655	0.642979
Indian Spinach		Basella alba L.	Pui Shak	1	1	X	X	X	X	0.249713	0.206817	0.30442	0.603347	0.222222	0.487884	0.0898785	0.326547	0.221562	0.548027	0.256303	0.609756	0.148365	0.510815	0.28511	0.602808	0.230241	0.568893	0.139655	0.325342	0.298308	0.512931	0.420749	0.626667
Jute		Corchorus capsularis L., C. olitorius L.	Pat Shak, Naila	1	1			X	X	0.265799		0.256047	0.350628	0.214976	0.304523			0.2691	0.419383	0.243697	0.476871			0.368866	0.582164	0.20189	0.419273			0.375779	0.543966	0.487032	0.570667
Kangkong	Water Spinach	Ipomoea aquatica Forssk.	Kolmi Shak	1	1	X	X	X	X	0.0291076	0.0157028	0.0508757	0.389958	0.0289855	0.191438	0.006	0.155537	0.0169779	0.268439	0.0252101	0.335576	0.0259849	0.374376	0.0296108	0.342692	0.0257732	0.200338	0.0181034	0.100171	0.0267142	0.0974138	0.0432277	0.128
Kohlrabi	Knolkhol	Brassica oleracea var. gongylodes L	Olkopi	1	1	X	X			0.002	0.001					0.005	0.128664					0.003	0.166389					0.003	0.0179795
Mung Bean	Green Gram	Vigna radiata (L.) R. Wilczek	Mug dal, Mug Uri	1	1		X			0.002		0.002	<0.1%			0	0.002					0.003	0.007					0.003	0.004
Okra	Lady's Finger	Abelmoschus esculentus (L.) Moench	Dherosh, Bendi	1	1	X		X	X	0.105324	0.07545	0.0667223	0.343096	0.0716586	0.288368			0.0670628	0.326758	0.0697479	0.345669			0.100677	0.321222	0.0661512	0.284869			0.103295	0.247414	0.170029	0.24
Pointed Gourd		Trichosanthes dioica Roxb.	Potol	1	1			X	X	0.002	<0.1%	0.003	0.008	0.002	0.0113086			0	0.008	<0.1%	0.0109336	0	0.003	<0.1%	0.004	0	0.003			0.002	0.005	0.006	0.003
Pumpkin (pale)*		Cucurbita maxima Duch	Mishti Kumra, Mishti Lao (Kacha)	1	1		X	X	X			0.0633862	0.136402	0.0491143	0.187399	0.104453	0.258143	0.0925297	0.313894	0.0941176	0.312027			0.160745	0.377374	0.118557	0.327134	0.164655	0.327055	0.166518	0.376724	0.242075	0.362667
Pumpkin (red)*		Cucurbita maxima Duch	Mishti Kumra, Mishti Lao (Lal)	1	1	X	X	X	X	0.464956	0.309843	0.120934	0.247699	0.089372	0.210016	0.0380567	0.105049	0.0636672	0.123499	0.0647059	0.20942	0.164292	0.440932	0.120135	0.285714	0.0919244	0.244294	0.0827586	0.196918	0.109528	0.243966	0.204611	0.296
Red Amaranth		Amaranthus tricolor convar. tristis (L.) Thell. ex Asch. & Graebn.	Lal Shak	1	1	X	X	X	X	0.16239	0.135963	0.0975813	0.462761	0.0555556	0.361874	0.0842105	0.516287	0.0254669	0.188679	0.0403361	0.309504	0.0796312	0.641431	0.0549915	0.41123	0.0360825	0.228233	0.0525862	0.236301	0.0338379	0.157759	0.0662824	0.149333
Ridged Gourd		Luffa acutangula (L.) Roxb.	Jhinga	1	1			X	X	0.008		0.269391	0.429289	0.213366	0.359451			0.365025	0.436535	0.220168	0.407906			0.291032	0.416185	0.229381	0.386306			0.30187	0.426724	0.391931	0.458667
Snake Gourd	Egyptian Gourd	Trichosanthes cucumerina var. anguina (L.) Haines	Foitscha, Chichinga	1	1	X		X	X	0.346993	0.220605	0.0767306	0.345607	0.0990338	0.306139			0.174024	0.270154	0.106723	0.287637			0.110829	0.260116	0.0747423	0.225697			0.101514	0.211207	0.167147	0.237333
Spinach		Spinacia oleracea L.	Palong Shak	1	1	X	X			0.0107239	<0.1%					0.0105263	0.192997					0.006	0.229617					0.006	0.0556507
Spiny Bitter Cucumber		Momordica cochinchinensis (Lour.) Spreng.	Karkul	1	1			X	X			0.0358632	0.136402	0.0289855	0.0718901			0.0424448	0.0900515	0.0168067	0.0496215			0.007	0.042114	0.0111684	0.0338123			0.0204809	0.0396552	0.0317003	0.0533333
Sponge Gourd		Luffa aegyptiaca Mill.	Dundol, Furol	1	1			X	X	0.0834929	0.0589812	0.0483736	0.0995816	0.0402576	0.100162			0.0543294	0.0720412	0.104202	0.179142	0.0259849	0.0615641	0.0406091	0.110652	0.0876289	0.203719			0.0231523	0.0810345	0.14121	0.205333
Teasel Gourd		Momordica dioica Roxb. ex Willd.	Kakrol	1	1			X	X	0.0953658	0.0658751	0.0175146	0.0443515	0.0136876	0.0436187			0.0288625	0.0634648	0.0352941	0.141295			0.0896785	0.172585	0.04811	0.103128			0.0587711	0.133621	0.0979827	0.213333
Tomato		Lycopersicon esculentum Mill.	Tomaato	1	1	X	X	X		0.23401	0.155496					0.161943	0.374593	0.024618	0.0823328			0.168483	0.556572	0.0812183	0.344344			0.176724	0.330479	0.0650045	0.187931	0.146974	0.245333
Turnip		Brassica rapa L.	Shalgom	1	1		X															<0.1%	0.0873544					0.003	0.010274
Vegetable Fern		Athyrium esculentum (Retz.) Copel.	Denki Shak	1	1		X		X	0.002	<0.1%			0	0.002	<0.1%	0.007			<0.1%	0.002	0.003	0.031614			0.003	0.008	0.002	0.002
Water Lily		Nymphaea nouchali Burm.f.	Shapla	1	1				X	0.001	0			0	0.003					0.004	0.0210261					0	0.0135249
White Radish		Raphanus sativus L.	Mulla	1	1	X	X			0.13941	0.112984					0.104453	0.37785					0.139983	0.504992					0.105172	0.204623
Yardlong Bean	String Bean, Cowpea	Vigna unguiculata (L.) Walp.	Borboti, Lob Uri	1	1	X	X	X	X	0.134814	0.080429			0.0797101	0.247981	0.0275304	0.118078	0.0933786	0.334477	0.0865546	0.359125	0.0326907	0.19218	0.0939086	0.317093	0.0764605	0.267963	0.0327586	0.110445	0.109528	0.237069	0.224784	0.322667
Fruits				1.5	1
Banana		Musa x paradisiaca L.	Kola	2	1		X	X	X	0.372654	0.280735	0.0950792	0.138075	0.185185	0.210824	0.245344	0.284202	0.204584	0.30446	0.25042	0.380992	0.302598	0.424293	0.295262	0.393889	0.21134	0.372781	0.275862	0.398116	0.257346	0.387069	0.288184	0.349333
Bengal Quince		Aegle marmelos (L.) Corrêa	Bel	2	1		X	X		0.0425124	0.0225967	0.0108424	0.005			0.0210526	0.0203583	0.0152801	0.016295					0.0169205	0.0239472			0.0189655	0.0205479	0.016919	0.0172414	0.0201729	0.0133333
Bilimbi		Averrhoa bilimbi L.	Bilambi	2	1		X	X	X			0.002	<0.1%	0.002	0.002	<0.1%	0.002	0.006	0.004	0.008	0.0142977			0.004	0.0123865	0.003	0.0143702	0.002	0.010274	0.004	0.012931	0.0201729	0.024
Burmese Grape		Baccaurea ramiflora Lour.	Lotkon, Bubi	2	1			X	X	0.002	<0.1%			0.002	<0.1%			0.002	0.003	0	0.005			0.002	0.0107349	<0.1%	0.004			<0.1%	0.006	0.009	0.005
Coconut		Cocos nucifera L.	Narikel	2	1		X	X	X	0.710073	0.493681	0.281902	0.335565	0.534622	0.571082	0.546559	0.572476	0.503396	0.590909	0.540336	0.641716	0.632735	0.709202	0.519459	0.617671	0.514605	0.627219	0.584483	0.648116	0.562778	0.631897	0.544669	0.570667
Custard Apple		Annona reticulata L.	Atafol	2	1			X	X	0.0674071	0.0386825	0.0166806	0.0158996	0.0136876	0.0266559			0.0118845	0.035163	0.0210084	0.0370059	0.030176	0.0757072	0.0245347	0.0561519	0.024055	0.0473373			0.0258237	0.0594828	0.0605187	0.0773333
Elephant Apple		Dillenia indica L.	Chalta	2	1			X	X	0.0340866	0.0176178	0.0225188	0.0209205	0.0297907	0.0484653			0.0178268	0.0265866	0.0436975	0.0891505	0.0502934	0.103993	0.0279188	0.0520231	0.0369416	0.0608622			0.0311665	0.0353448	0.0403458	0.0613333
Gamboge Tree		Garcinia xanthochymus Hook.f. ex Anders.	Defol	2	1				X	0.008	0.005	0.002	0.003	0.003	0.006					0.005	0.0243902					0.004	0.0101437
Guava		Psidium guajava L.	Peara, Shobri	2	1		X	X	X	0.381846	0.251628			0.293076	0.351373	0.237247	0.292345	0.355759	0.465241	0.357143	0.468461	0.337804	0.462562	0.457699	0.521057	0.354811	0.45224	0.294828	0.386986	0.412289	0.501724	0.472622	0.464
Hog Plum		Spondias dulcis Soland. ex G. Forst.	Barisaler Amra	2	1				X	0.147453	0.0888548			0.0233494	0.0274637			0.0530071	0.117647	0.0319328	0.0479394	0.0310143	0.0557404			0.0274914	0.0473373
Indian Olive		Elaeocarpus robustus Roxb.	Jolpai, Belfoi	2	1		X		X	0.0379165	0.0126388			0.031401	0.0476575	0.0275304	0.0374593			0.0327731	0.0731707	0.0368818	0.0732113			0.0438144	0.0617075	0.037069	0.0582192
Indian Plum		Flacourtia jangomas (Lour.) Raeusch.	Tak rui fol, Lokloki	2	1				X	<0.1%				<0.1%	0.002					0.003	0.007					0.002	0.004
Jackfruit		Artocarpus heterophyllus Lam.	Kathal	2	1			X	X	0.498277	0.193029	0.172644	0.224268	0.110306	0.133279			0.22326	0.282161	0.197479	0.264087			0.266497	0.328654	0.176117	0.238377			0.279608	0.335345	0.325648	0.378667
Jambolan		Syzygium cuminii (L.) Skeels	Kalajam, Kujam	2	1			X	X	0.181923	0.07545			0.0531401	0.0476575			0.0407747	0.0898396	0.0529412	0.101766			0.072758	0.087531	0.056701	0.0912933			0.0810329	0.108621	0.213256	0.218667
Jujube		Ziziphus jujuba Mill.	Boroi, Kul	2	1		X	X		0.228265	<0.1%	0.0842369	0.0870293			0.192713	0.219055	0.0882852	0.110635			0.215569	0.319018	0.142978	0.151941			0.198276	0.253425	0.138914	0.169828	0.175793	0.16
Lemon		Citrus limon Burm.f.	Lebu	2	1		X	X	X	0.106856	0.0693221	0.0517098	0.0627615	0.057971	0.0815832	0.0518219	0.0773616	0.0662139	0.124357	0.0882353	0.12111	0.0997485	0.160566	0.105753	0.180017	0.088488	0.131868	0.0827586	0.142979	0.121104	0.168966	0.184438	0.226667
Lepisanthes		Lepisanthes rubiginosa (Roxb.) Leenh.	Hoisura, Koisura	2	1		X	X	X			0	0	0	0	<0.1%	0	0	0.002	0.005	0.0126156	0.007	0.0124792	0.003	0.01	0.005	0.008	0.002	0.002	0.008	0.005	0.0230548	0.003
Lime		Citrus aurantiifolia (Christm. & Panz.) Swingle	Kakogi Lebu	2	1		X	X	X	0.0222137	0.0103409	<0.1%	0.002	0.004	0.004	0.003	0.012215	0.003	0.016295	0.006	0.007	<0.1%	0.007	0.007	0.0115607	0.002	0.009	0.002	0.003	0.002	0.008	0.009	0.0266667
Lychee		Litchi chinensis Sonn.	Lechu	2	1			X		0.0413635	0.0126388	0.006	0.0192469					0.0101868	0.0274443					0.0118443	0.0222956					0.009	0.0353448	0.0259366	0.0506667
Mandarin Orange		Citrus reticulata Blanco	Komola	2	1		X	X		0.002		0.002	0.003			0.003	0.004	0.003	0.005			<0.1%	0.0124792	0.003	0.007			0.003	0.007	0.006	0.008	0.0115274	0.0106667
Mango		Mangifera indica L.	Am	2	1			X	X	0.749904	0.458828	0.361134	0.474477	0.220612	0.199515			0.555457	0.638053	0.403361	0.416316			0.672589	0.720066	0.37457	0.393914			0.558326	0.661207	0.740634	0.688
Mango Plum		Spondias pinnata (Koenig & L.f.) Kurz	Deshi Amra	2	1				X					0.0636071	0.117124					0.116807	0.216989	0.0947192	0.189684			0.0962199	0.179205
Monkey Fruit		Artocarpus gomezianus Wall. ex Trécul	Dewa	2	1			X	X	0.0122558	0.006			0.004	0.002			0.002	<0.1%	0.005	0.008			0.003	0.0123865	0.002	0.005			0.009	0.009	0.0201729	0.0266667
Muskmelon	Honeymelon	Cucumis melo L.	Kamkura, Bangi, Futa, Karamuja	2	1			X		0.003	0	0.003	0.004					0.0195246	0.0197256					0.0296108	0.0412882					0.0186999	0.012069	0.0144092	0.0266667
Otaheite Gooseberry		Phyllantus acidus (L.) Skeels	Orboroi, Lebur	2	1		X	X	X	0.003	<0.1%	0.0108424	0.0158996	0.0169082	0.0306947	0.0145749	0.0211726	0.0135823	0.0231561	0.0142857	0.0269134	0.0192791	0.0432612	0.0211506	0.0330306	0.009	0.0245139	0.008	0.0291096	0.01	0.0284483	0.0403458	0.032
Palmyra Palm		Borassus flabellifer L.	Tal	2	1				X	0.0149368	0.004			0.002	0.002					0.008	0.0100925					0.003	0.006
Papaya		Carica papaya L.	Pepe, Koifol	2	1	X	X	X	X	0.225201	0.157411	0.0809008	0.121339	0.110306	0.136511	0.0987854	0.165309	0.118846	0.190395	0.154622	0.28259	0.124057	0.262895	0.120981	0.252684	0.143471	0.287405	0.158621	0.238014	0.129118	0.266379	0.201729	0.301333
Pineapple		Ananas comosus (L.) Merrill	Anarash	2	1		X	X	X	0.0122558	0.004	0.003	0.002	0.007	<0.1%	0.003	0.003	0.004	0.006	0.007	0.0100925			0.0101523	0.0165153	0.005	0.008	<0.1%	0.010274	0.003	0.004	0.009	0.0106667
Pomegranate		Punica granatum L.	Dalim	2	1				X	0.002				0.003	0.004					0.004	0.005	0.002	0.0108153			0.003	0.005
Pummelo		Citrus maxima (Burm.) Merrill	Jambura	2	1				X	0.302566	0.201072			0.205314	0.264943					0.214286	0.295206					0.219931	0.278952
Rose Apple		Syzygium jambos (L.) Alston	Gulapjam	2	1		X		X					<0.1%	<0.1%	0.003	0.003			0.004	0.007	0.007	0.0141431			<0.1%	0.006	0.003	0.005
Star Fruit	Carambola	Averrhoa carambola L.	Kamranga	2	1		X	X	X	0.0712371	0.0440444	0.0475396	0.0393305	0.0942029	0.101777	0.065587	0.0716612	0.065365	0.0797599	0.1	0.125315	0.0779547	0.123128	0.0972927	0.138728	0.0876289	0.140321	0.0896552	0.111301	0.102404	0.122414	0.149856	0.162667
Sugar Apple		Annona squamosa L.	Shorupha	2	1			X	X			0	<0.1%	0	<0.1%			0.003	0.003	0.008	0.0100925	<0.1%	0.004	0.005	0.008	0.004	0.006			0.003	0.006	0.009	0.016
Tamarind		Tamarindus indica L.	Tetul	2	1		X	X	X	0.0122558		0.0108424	0.023431	0.0201288	0.0339257	0.0291498	0.0252443	0.016129	0.0248714	0.0235294	0.0529857	0.0293378	0.0607321	0.0135364	0.0355078	0.0197595	0.046492	0.0284483	0.0590753	0.0276046	0.0387931	0.0432277	0.0453333
Wax apple		Syzygium samarangense (Blume) Merr. & L.M.Perry	Jamrul	2	1			X																0.006	0.004					0.0133571	0.0258621	0.0259366	0.008
Spices				2.5	1
Brown Mustard		Brassica juncea (L.) Czern.	Shurisha, Lai Shak, Rai Shak	3	1	X	X			0.110686	0.078131					0.0963563	0.20114					0.158424	0.384359					0.130172	0.244863
Celery		Apium graveolens L.	Rhaduni	3	1		X			<0.1%						0.002	0.005					0.0687343	0.109817					0.0215517	0.0505137
Chili		Capsicum annuum L.	Murich	3	1		X	X	X	0.190732		0.0667223	0.133054	0.0869565	0.163166	0.127126	0.210098	0.089983	0.171527	0.0865546	0.203532	0.158424	0.366057	0.167513	0.364162	0.0790378	0.208791	0.134483	0.254281	0.130899	0.253448	0.242075	0.389333
Coriander		Coriandrum sativum L.	Donia, Chira Bakor	3	1		X			0.0662581						0.059919	0.10342											0.0853448	0.172089
False Coriander		Eryngium foetidum L.	Dhone Pata, Bilati, Bakor Pata	3	1		X	X	X	<0.1%		0.0625521	0.112134	0.0483092	0.112278	0.0817814	0.175081	0.0747029	0.17753	0.105882	0.248949	0.196144	0.458403	0.207276	0.447564	0.130584	0.297549	0.115517	0.233733	0.186999	0.311207	0.259366	0.392
Fragrant Screw Pine		Pandanus amaryllifolius Roxb.	Fulap, Faiash Pata	3	1		X	X	X			0.002	0.004	<0.1%	0.004	0	0.006	0.003	0.004	0.0109244	0.020185	0.0134116	0.0266223	0.0169205	0.0247729	0.0111684	0.0245139	0.005	0.0128425	0.008	0.025	0.0317003	0.0586667
Garlic		Allium sativum L.	Roshun	3	1		X			0.0172348						0.011336	0.0333876											0.005	0.0556507
Ginger		Zingiber officinale Roscoe	Adha	3	1		X			0.006						0.002	0.003					0.004	0.0207987					0.007	0.0136986
Indian Bay Leaf		Cinnamonum tamala (Buch.-Ham.) T. Nees & C.H. Eberm.	Tejpata	3	1		X	X	X			0	<0.1%	0	0.004	<0.1%	0.004	0.002	0.005	0.005	0.0243902	0.004	0.031614	0.008	0.0264244	0.003	0.0236686	<0.1%	0.0128425	<0.1%	0.0146552	0.0201729	0.04
Onion		Allium cepa L.	Peaj	3	1		X			0.0294906						0.0210526	0.0651466											0.0155172	0.0864726
Roselle		Hibiscus sabdariffa L.	Huilfa Shak, Ful, Tokfol	3	1		X			0.0103409						0.005	0.0285016					0.015088	0.0723794					0.008	0.0291096
Turmeric		Curcuma longa L.	Holud	3	1		X			0.0149368						0.005	0.0105863					0.003	0.0291181					0.007	0.0205479
Staples				3.5	1
Blue Taro		Xanthosoma nigrum (Vell.) Mansf.	Krishno Kochu	4	1		X	X	X	0.0310226				0.007	0.0210016	0.004	0.0138436	0.0186757	0.0668954	0.154622	0.32296	0.164292	0.333611	0.0778342	0.23782	0.0584192	0.19273	0.0301724	0.0873288	0.0365093	0.135345	0.074928	0.144
Giant Taro		Alocasia macrorrhizos (L.) G. Don ex Sweet	Pan Kochu	4	1				X	0.004				0.006	0.0169628					0.008	0.0470984	0.0352054	0.104825			0.0266323	0.102282
Greater Yam	Purple Yam	Dioscorea alata L.	Mete aloo	4	1		X	X				0.002	0.008			0.004	0.0374593	0.009	0.0274443			0.005	0.015807	0.0109983	0.0338563			0.004	0.0136986	0.0106857	0.0206897	0.037464	0.0586667
Plantain		Musa x paradisiaca L. (AAB group)	Kancha kola	4	1		X	X	X													0.007	0.0574043	0.0203046	0.0520231			<0.1%	0.0145548	0.0160285	0.0293103	0.0461095	0.0826667
Potato		Solanum tuberosum L.	Aloo	4	1		X			0.0658751						0.0493927	0.101792					0.0385583	0.100666					0.0508621	0.0744863
Potato Yam		Dioscorea bulbifera L.	Bon Aloo	4	1				X					0.004	0.003					0.006	0.0126156					0.005	0.0118343
Sweet Potato (orange)*		Ipomoea batatas (L.) Lam.	Lal Mishti Aloo	4	1	X		X		0.008		0.003	0.01841					0.006	0.179245					<0.1%	0.307184					0.006	0.218103	0.0172911	0.104
Sweet Potato (white)*		Ipomoea batatas (L.) Lam.	Shada Mishti Aloo	4	1			X				0.008	0.008					0.008	0.0171527					0.0118443	0.0784476					0.008	0.0336207	0.0317003	0.08
Taro		Colocasia esculenta (L.) Schott ex Schott & Endl.	Kochu	4	1		X	X	X	0.136346	0.114516			0.0507246	0.0840065	0.0421053	0.0952769	0.142615	0.180961	0.003	0.019344	0.0368818	0.138935	0.167513	0.203964	0.101375	0.176669	0.0387931	0.0787671	0.048976	0.0827586	0.074928	0.12
Not in index (rare species)				0.5	0
Vegetables				0.7	0
Black gram		Vigna mungo L.	Mashkalai	1	0		X															0	0					0	0
Bokful	Vegetable Hummingbird, Agati	Sesbania grandiflora	Bokful	1	0		X																					0	0
Chick pea		Cicer arietinum L.	Sola/Chana but	1	0		X																					0.002	0.003
Field Pea		Pisum sativum L.	Mator Dal	1	0		X			<0.1%		0	0.001			<0.1%	0.002											<0.1%	<0.1%
Grass pea	Chickling Vetch	Lathyrus sativus	Khesari dal	1	0		X																					0	0
Moringa	Drumstick	Moringa oleifera Lam.	Shajna	1	0		X	X	X			0	0.002	<0.1%	0.002	0	<0.1%	0	0.003	0	0.003			<0.1%	0.003	0	0.002	0	<0.1%	<0.1%	0.002	0	0.005
Pigeon Pea		Cajanus cajan (L.) Millsp.	Arol Dal	1	0		X			<0.1%						0	<0.1%					0	0.005					0	0.003
Sesbania		Sesbania sesban (L.) Merr.	Donche, Dacha	1	0			X	X	0.0122558		0	0	<0.1%	0			0	0.003
Whorled Malva		Malva verticillata L.	Napa shaka/Hapa shaka	1	0		X															0	0.002					0	<0.1%
Winged Bean		Psophocarpus tetragonolobus (Stickm.) DC.	Kamranga Uri	1	0		X					<0.1%	0.002			0	0.006					<0.1%	0.008					<0.1%	<0.1%
Fruits				1.5	0
Cane Fruit		Calamus tenuis Roxb.	Bet(fol)	2	0				X	0.007	0.002	0	0	0	0					0.002	0.003					0.002	0.002
Fig		Ficus carica	Dumur	2	0				X													0	0.003
Grape		Vitis vinifera L.	Angur	2	0				X	<0.1%				0	0.002					0	<0.1%					0	<0.1%
Indian Date		Phoenix sylvestris (L.) Roxb.	Kechur	2	0			X		0.009	0.003	<0.1%	0					0.004	0.003					0.003	0.003					0.003	0.006	0.006	0.005
Indian Gooseberry		Phyllanthus emblica L.	Amloki	2	0		X			0.002	<0.1%					0	0.002											0	<0.1%
Indian Persimmon	Gaub	Diospyros malabarica (Desr.) Kostel.	Gab	2	0			X	X	<0.1%				0	0			<0.1%	0.003	<0.1%	0.004			0	0.005	<0.1%	0.006			0.002	0.003	0.003	0.0106667
Karanda		Carissa carandas	Karomcha	2	0				X													0	<0.1%
Orange		Citrus sinsensis (L.) Osbeck	Malta	2	0		X	X	X	<0.1%		0	<0.1%	0.003	0.002	<0.1%	<0.1%	<0.1%	0.003	0	0.006	0	0.004	<0.1%	0.002	<0.1%	0.004	0	0.003	0.002	0.005	0.006	0.008
Pear		Pyrus Communis	Nashpati	2	0				X													0	0
Sapote		Manilkara zapota (L.) van Royen	Shofeda	2	0		X	X	X	0.004	<0.1%	<0.1%	0.002	0	0	0	0	0	0	0	0	0.002	0	0	0.002	0	0	0	0	<0.1%	0.002	0.003	0.003
Satkara		Citrus macoptera	Satkara	2	0		X															0	0					0	0
Water chestnut		Trapa bicornis	Panifol	2	0				X													0	0.002
Watermelon		Citrullus lanatus (Thunb.) Matsum. & Nakai	Tormuch	2	0			X		<0.1%	0	0	0					<0.1%	<0.1%					0.003	<0.1%					0	<0.1%	0	0
Wood Apple		Limonia acidissima	Kodbel	2	0		X	X	X			0	0	0.004	<0.1%	0.002	0	0	0	0.003	<0.1%	0.003	0.003	<0.1%	0	0.003	0.004	<0.1%	0.003	0	0	0.003	0.003
Spices				2.5	0
Cardamon		Elettaria cardamomum	Elach	3	0		X															0	0.002					0	<0.1%
Cumin		Cuminum cyminum	Jira	3	0		X															0	0					0	0.002
Fenugreek		Trigonella foenum-graecum	Methi	3	0		X															0	<0.1%					0	0
Linseed		Linum usitatissimum L.	Tishi	3	0		X			<0.1%						0	<0.1%											<0.1%	0.003
Sesame		Sesamum indicum L.	Tila	3	0			X	X	0.002		0	0.001	0	0			0	<0.1%	0	0.002			0	<0.1%	0	0.003			0	0.002	0.003	0
Yellow Myrobalan		Terminalia chebula	Hortoki	3	0		X															0.002	0.003					<0.1%	0.003
Yellow Sorrel		Oxalis corniculata L.	Amrai, Amrul	3	0		X									0.002	0.003					0	0.002					<0.1%	0.002
* Pumpkin and sweet potato are counted twice as there were two distinct varieties (orange/red- and white/pale-colored flesh), of which the orange/red varieties were promoted by the program.
** Collected in a subsample (n=722, for details see nethods and Table 1)
The FAARM trial was undertaken in Habiganj District, Sylhet Division, Bangladesh. FAARM: Food and Agricultural Approaches to Reducing Malnutrition.

## Sheet: AF main reg
Annex F: Regression results for the intervention impact on harvested crop species richness overall, by crop type, and by promoted species vs not, over all years and by intervention year
	Observations from all women (n=24,528)
	All crops				Vegetables				Fruits				Directly promoted				Not directly promoted
	Annual		All years		Annual		All years		Annual		All years		Annual		All years		Annual		All years
	coef	p	coef	p	coef	p	coef	p	coef	p	coef	p	coef	p	coef	p	coef	p	coef	p
Annual intervention impact
First year	3.6359	<0.001			3.07852	<0.001			0.353718	0.00566567			2.38026	<0.001			1.24199	<0.001
Second year	4.55343	<0.001			3.30213	<0.001			0.706476	<0.001			2.73155	<0.001			1.80929	<0.001
Final year	6.34298	<0.001			4.3426	<0.001			0.964815	<0.001			3.58029	<0.001			2.75829	<0.001
Scale-down	3.7889	<0.001			2.29283	<0.001			0.746053	<0.001			1.92059	<0.001			1.85251	<0.001
Post-intervention	3.26492	<0.001			2.0731	<0.001			0.480575	0.004			1.67766	<0.001			1.55535	<0.001
All year intervention impact			4.69702	<0.001			3.33222	<0.001			0.708102	<0.001			2.72223	<0.001			1.96421	<0.001
Baseline production	0.405683	<0.001	0.406037	<0.001	0.236562	<0.001	0.235761	<0.001	0.439428	<0.001	0.438819	<0.001	0.340772	<0.001	0.339669	<0.001	0.451146	<0.001	0.452012	<0.001
Year of survey (ref. First year)
Second year	0.195222	0.0865905	0.657016	<0.001	-0.0127405	0.863801	0.0985002	0.0733141	0.535148	<0.001	0.712129	<0.001	-0.513726	<0.001	-0.337073	<0.001	0.71282	<0.001	0.997258	<0.001
Final year	0.366551	0.00533739	1.73347	<0.001	-0.142681	0.0588695	0.494714	<0.001	0.616987	<0.001	0.924897	<0.001	-0.461284	<0.001	0.143938	0.0134046	0.884005	<0.001	1.64718	<0.001
Scale-down	0.273387	0.048025	0.350893	0.002	0.0548668	0.515045	-0.343663	<0.001	0.824746	<0.001	1.02221	<0.001	-0.532982	<0.001	-0.765662	<0.001	0.836838	<0.001	1.1433	<0.001
Post-intervention	3.16506	<0.001	2.9535	<0.001	1.80596	<0.001	1.27669	<0.001	1.48694	<0.001	1.54616	<0.001	0.758763	<0.001	0.386758	<0.001	2.42781	<0.001	2.57564	<0.001
Season of survey (ref. Winter)
Hot	1.58213	<0.001	1.57981	<0.001	1.49775	<0.001	1.49261	<0.001	-0.953908	<0.001	-0.950633	<0.001	1.11822	<0.001	1.11399	<0.001	0.752837	<0.001	0.753831	<0.001
Rainy	-0.628993	<0.001	-0.624307	<0.001	0.115151	0.0331439	0.113459	0.0376876	-1.63263	<0.001	-1.62792	<0.001	1.10238	<0.001	1.09667	<0.001	-1.07668	<0.001	-1.07489	<0.001
Number of crops asked	0.267626	<0.001	0.266554	<0.001	0.287274	<0.001	0.28612	<0.001	0.20398	<0.001	0.20367	<0.001	0.235422	<0.001	0.234655	<0.001	0.227492	<0.001	0.227349	<0.001
Missing baseline	0.900816	0.0343446	0.893397	0.0359984	-0.1903	0.453149	-0.191338	0.451309	0.279819	0.0789523	0.277397	0.0815965	-0.0173357	0.929442	-0.0196295	0.92025	-0.191729	0.463827	-0.198242	0.448876
	Observations from the subsample of women with young children born 2017-2019 (measured again in 2021, n=7,431)
	All crops				Vegetables				Fruits				Directly promoted				Not directly promoted
	Annual		All years		Annual		All years		Annual		All years		Annual		All years		Annual		All years
	coef	p	coef	p	coef	p	coef	p	coef	p	coef	p	coef	p	coef	p	coef	p	coef	p
Annual intervention impact
First year	3.42937	<0.001			3.00941	<0.001			0.291695	0.104269			2.29019	<0.001			1.11411	<0.001
Second year	3.79135	<0.001			2.87718	<0.001			0.428527	0.0128475			2.38408	<0.001			1.37047	<0.001
Final year	5.64571	<0.001			3.97947	<0.001			0.719437	<0.001			3.20625	<0.001			2.42176	<0.001
Scale-down	3.215	<0.001			2.10068	<0.001			0.454408	0.0112775			1.75575	<0.001			1.4207	<0.001
Post-intervention	2.72371	<0.001			1.82339	<0.001			0.26942	0.168181			1.44759	<0.001			1.23753	<0.001
All year intervention impact			4.01141	<0.001			2.94993	<0.001			0.470536	0.004			2.38042	<0.001			1.60356	<0.001
Baseline production	0.431201	<0.001	0.431434	<0.001	0.242008	<0.001	0.240698	<0.001	0.466327	<0.001	0.466772	<0.001	0.364865	<0.001	0.364927	<0.001	0.487482	<0.001	0.489168	<0.001
Year of survey (ref. First year)
Second year	0.538931	0.017204	0.729963	<0.001	0.110403	0.453066	0.0418487	0.694933	0.743939	<0.001	0.815801	<0.001	-0.378017	0.003	-0.328978	<0.001	0.914341	<0.001	1.04795	<0.001
Final year	0.38575	0.136224	1.55057	<0.001	-0.195312	0.189494	0.31452	0.004	0.757391	<0.001	0.982133	<0.001	-0.46436	<0.001	0.015702	0.888209	0.906726	<0.001	1.59067	<0.001
Scale-down	0.243823	0.367803	0.133724	0.531532	-0.0788775	0.63212	-0.554521	<0.001	1.02477	<0.001	1.11017	<0.001	-0.653579	<0.001	-0.933756	<0.001	0.930822	<0.001	1.09002	<0.001
Post-intervention	3.254	<0.001	2.89047	<0.001	1.80564	<0.001	1.18866	<0.001	1.64375	<0.001	1.63295	<0.001	0.751912	<0.001	0.313274	0.0199424	2.53094	<0.001	2.59435	<0.001
Season of survey (ref. Winter)
Hot	1.55248	<0.001	1.55026	<0.001	1.3408	<0.001	1.33753	<0.001	-0.892818	<0.001	-0.889797	<0.001	1.19914	<0.001	1.19957	<0.001	0.730063	<0.001	0.730183	<0.001
Rainy	-0.731934	<0.001	-0.729847	<0.001	-0.0458123	0.659156	-0.0485338	0.643358	-1.50822	<0.001	-1.50391	<0.001	1.17901	<0.001	1.17805	<0.001	-1.04778	<0.001	-1.04875	<0.001
Number of crops asked	0.266162	<0.001	0.265152	<0.001	0.265147	<0.001	0.264397	<0.001	0.193798	<0.001	0.193379	<0.001	0.259754	<0.001	0.258431	<0.001	0.21615	<0.001	0.216134	<0.001
Missing baseline	0.17023	0.796185	0.168163	0.799	-0.519467	0.176586	-0.520685	0.176589	-0.0779466	0.755663	-0.0779775	0.755707	-0.261428	0.366973	-0.262162	0.366776	-0.819848	0.0511083	-0.823899	0.0501827
The FAARM trial was undertaken in Habiganj District, Sylhet Division, Bangladesh. FAARM: Food and Agricultural Approaches to Reducing Malnutrition. Estimates were calculated using multilevel regression models adjusting for the other variables shown, with random effects at the settlement and woman levels to account for clustering. Year-wise estimates were calculated using an interaction term betwe…

## Sheet: AH combo
Annex H: Mean number of crop species harvested from homegardens by intervention arm and season during the FAARM trial
	Control	Intervention					Control	Intervention
Season	Mean	Mean	Difference	p	n		Mean	Mean	Difference	p	n
	Observations from all women						Observations from the subsample of women with young children born 2017-2019 (measured again in 2021)
All crops
Year 1
Hot 2016	3.99917	7.78996	3.79079	<0.001	2394		4.04839	7.64179	3.5934	<0.001	645
Rainy 2016	4.32448	7.75767	3.4332	<0.001	2480		4.16564	7.81482	3.64917	<0.001	677
Year 2
Winter 2016/2017	4.03077	8.03094	4.00018	<0.001	2463		4.33233	8.1264	3.79408	<0.001	687
Hot 2017	5.10943	9.24468	4.13525	<0.001	2344		5.41551	8.76631	3.3508	<0.001	650
Rainy 2017	5.19748	10.7586	5.56114	<0.001	2379		5.32317	10.2657	4.94254	<0.001	678
Year 3 (final year)
Winter 2017/2018	5.32397	13.1395	7.8155	<0.001	2395		5.27974	12.5134	7.23363	<0.001	681
Hot 2018	6.46362	12.4401	5.97651	<0.001	2393		6.29907	12.1089	5.80987	<0.001	679
Rainy 2018	4.98797	10.1598	5.17179	<0.001	2347		4.91304	9.59259	4.67955	<0.001	673
Year 4 (scale-down)
Winter 2018/2019a	4.48879	7.95719	3.4684	<0.001	2328		4.39564	7.44571	3.05008	<0.001	671
Hot 2019a	6.06055	10.0534	3.9929	<0.001	2283		6	9.77778	3.77778	<0.001	668
Year 6 (post-intervention)
Hot 2021	8.8732	11.736	2.8628	<0.001	722		8.8732	11.736	2.8628	0.001	722
Vegetables
Year 1
Hot 2016	2.59216	5.90628	3.31412	<0.001	2394		2.58065	5.81194	3.2313	<0.001	645
Rainy 2016	2.02899	4.89338	2.86439	<0.001	2480		1.90798	5.03134	3.12336	<0.001	677
Year 2
Winter 2016/2017	1.97409	5.12622	3.15213	<0.001	2463		2.12689	5.20225	3.07536	<0.001	687
Hot 2017	2.27165	5.1458	2.87415	<0.001	2344		2.43226	4.85882	2.42657	<0.001	650
Rainy 2017	2.11092	6.0984	3.98748	<0.001	2379		2.07317	5.71714	3.64397	<0.001	678
Year 3 (final year)
Winter 2017/2018	2.28164	7.73544	5.4538	<0.001	2395		2.25846	7.39045	5.13199	<0.001	681
Hot 2018	2.83503	6.91412	4.0791	<0.001	2393		2.64174	6.6648	4.02306	<0.001	679
Rainy 2018	2.05241	5.55452	3.50212	<0.001	2347		1.91615	5.17949	3.26334	<0.001	673
Year 4 (scale-down)
Winter 2018/2019a	2.03879	4.11901	2.08021	<0.001	2328		1.92835	3.92286	1.99451	<0.001	671
Hot 2019a	2.77649	5.26379	2.4873	<0.001	2283		2.63407	5.151	2.51693	<0.001	668
Year 6 (post-intervention)
Hot 2021	4.36023	6.30933	1.9491	<0.001	722		4.36023	6.30933	1.9491	<0.001	722
Fruits
Year 1
Hot 2016	1.26439	1.59916	0.334776	0.039146	2394		1.32581	1.5403	0.214492	0.349793	645
Rainy 2016	2.09179	2.45557	0.363786	0.0563554	2480		2.04294	2.42165	0.378708	0.124612	677
Year 2
Winter 2016/2017	1.54494	1.81107	0.266136	0.0537711	2463		1.67674	1.82584	0.149106	0.385896	687
Hot 2017	2.48379	3.2687	0.784904	<0.001	2344		2.64132	3.08984	0.448521	0.106022	650
Rainy 2017	2.70672	3.76114	1.05442	<0.001	2379		2.90244	3.71143	0.80899	0.00938832	678
Year 3 (final year)
Winter 2017/2018	2.13453	3.15361	1.01908	<0.001	2395		2.14743	3.08078	0.933349	<0.001	681
Hot 2018	2.93909	3.74979	0.810707	<0.001	2393		3.00935	3.67318	0.663839	0.0155105	679
Rainy 2018	2.51976	3.5672	1.04744	<0.001	2347		2.63975	3.42735	0.787599	0.0148106	673
Year 4 (scale-down)
Winter 2018/2019a	1.78966	2.38271	0.59305	<0.001	2328		1.92835	2.27143	0.34308	0.0584227	671
Hot 2019a	2.83081	3.66552	0.834707	<0.001	2283		2.97792	3.58405	0.606128	0.0297718	668
Year 6 (post-intervention)
Hot 2021	3.67723	3.95733	0.2801	0.383892	722		3.67723	3.95733	0.2801	0.383892	722
The FAARM trial was undertaken in Habiganj District, Sylhet Division, Bangladesh. FAARM: Food and Agricultural Approaches to Reducing Malnutrition.
						.
The FAARM trial was undertaken in Habiganj District, Sylhet Division, Bangladesh. FAARM: Food and Agricultural Approaches to Reducing Malnutrition.

## Sheet: AJ crops
Annex J: Impact on harvest frequencies of promoted vegetable species over time
Crop	Year 1					Year 2					Year 3 (final year)					Year 4 (scale-down)					Year 6 (post-intervention)
	Con	Int	p	n		Con	Int	p	n		Con	Int	p	n		Con	Int	p	n		Con	Int	p	n
Observations from all women
Only hot seasons
Green amaranth	0.273561	0.533891	<0.001	2394		0.24618	0.482847	<0.001	2344		0.358714	0.673823	<0.001	2393		0.384684	0.603448	<0.001	2283		0.570605	0.688	0.00505472	722
Ash gourd	0.317765	0.483682	<0.001	2394		0.335314	0.477702	<0.001	2344		0.288494	0.579686	<0.001	2393		0.334817	0.510345	<0.001	2283		0.400576	0.554667	<0.001	722
Indian spinach	0.30442	0.603347	<0.001	2394		0.221562	0.548027	<0.001	2344		0.28511	0.602808	<0.001	2393		0.298308	0.512931	<0.001	2283		0.420749	0.626667	<0.001	722
Bottle gourd	0.225188	0.403347	<0.001	2394		0.0483871	0.16295	<0.001	2344		0.165821	0.34104	<0.001	2393		0.0872663	0.193966	<0.001	2283		0.224784	0.36	0.00558039	722
Eggplant	0.06005	0.164017	<0.001	2394		0.0636672	0.167238	<0.001	2344		0.126058	0.420314	<0.001	2393		0.123776	0.268103	<0.001	2283		0.210375	0.36	<0.001	722
Papaya	0.0809008	0.121339	0.0731652	2394		0.118846	0.190395	0.00190615	2344		0.120981	0.252684	<0.001	2393		0.129118	0.266379	<0.001	2283		0.201729	0.301333	0.00509967	722
Pumpkin (red)	0.120934	0.247699	<0.001	2394		0.0636672	0.123499	0.0198691	2344		0.120135	0.285714	<0.001	2393		0.109528	0.243966	<0.001	2283		0.204611	0.296	0.0233247	722
Snake gourd	0.0767306	0.345607	<0.001	2394		0.174024	0.270154	<0.001	2344		0.110829	0.260116	<0.001	2393		0.101514	0.211207	<0.001	2283		0.167147	0.237333	0.0421384	722
Okra	0.0667223	0.343096	<0.001	2394		0.0670628	0.326758	<0.001	2344		0.100677	0.321222	<0.001	2393		0.103295	0.247414	<0.001	2283		0.170029	0.24	0.0697502	722
Yardlong bean						0.0933786	0.334477	<0.001	2344		0.0939086	0.317093	<0.001	2393		0.109528	0.237069	<0.001	2283		0.224784	0.322667	0.0461195	722
Tomato						0.024618	0.0823328	<0.001	2344		0.0812183	0.344344	<0.001	2393		0.0650045	0.187931	<0.001	2283		0.146974	0.245333	0.00882364	722
Red amaranth	0.0975813	0.462761	<0.001	2394		0.0254669	0.188679	<0.001	2344		0.0549915	0.41123	<0.001	2393		0.0338379	0.157759	<0.001	2283		0.0662824	0.149333	<0.001	722
Kangkong	0.0508757	0.389958	<0.001	2394		0.0169779	0.268439	<0.001	2344		0.0296108	0.342692	<0.001	2393		0.0267142	0.0974138	<0.001	2283		0.0432277	0.128	0.001	722
Bitter gourd	0.0225188	0.262762	<0.001	2394		0.0144312	0.246141	<0.001	2344		0.0135364	0.190751	<0.001	2393		0.0204809	0.113793	<0.001	2283		0.0576369	0.130667	0.002	722
Sweet potato (orange)	0.00250209	0.01841	0.0278842	2394		0.00594227	0.179245	<0.001	2344		0.000846024	0.307184	<0.001	2393		0.0062333	0.218103	<0.001	2283		0.0172911	0.104	<0.001	722
Only winter seasons
Brown mustard						0.0963563	0.20114	<0.001	2463		0.158424	0.384359	<0.001	2395		0.130172	0.244863	<0.001	2328
White radish						0.104453	0.37785	<0.001	2463		0.139983	0.504992	<0.001	2395		0.105172	0.204623	<0.001	2328
Cauliflower						0.0145749	0.0618892	0.00114581	2463		0.0117351	0.171381	<0.001	2395		0.0103448	0.0368151	0.000715209	2328
Cabbage						0.0129555	0.149023	<0.001	2463		0.0100587	0.185524	<0.001	2395		0.00603448	0.0239726	0.00588852	2328
Spinach						0.0105263	0.192997	<0.001	2463		0.00586756	0.229617	<0.001	2395		0.00603448	0.0556507	<0.001	2328
Carrot						0.00242915	0.0732899	<0.001	2463		0.00419112	0.18386	<0.001	2395		0.00172414	0.0231164	0.001	2328
Kohlrabi						0.0048583	0.128664	<0.001	2463		0.00335289	0.166389	<0.001	2395		0.00258621	0.0179795	0.00548225	2328
Observations from the subsample of women with young children born 2017-2019 (measured again in 2021)
Only hot seasons
Green/Stem Amaranth	0.26129	0.516418	<0.001	645		0.245161	0.455882	<0.001	650		0.323988	0.650838	<0.001	679		0.381703	0.606838	<0.001	668		0.570605	0.688	0.00505472	722
Ash Gourd	0.293548	0.450746	<0.001	645		0.309677	0.45	0.003	650		0.264798	0.575419	<0.001	679		0.337539	0.507123	0.001	668		0.400576	0.554667	<0.001	722	.
Indian Spinach	0.274194	0.614925	<0.001	645		0.245161	0.520588	<0.001	650		0.264798	0.581006	<0.001	679		0.26183	0.51567	<0.001	668		0.420749	0.626667	<0.001	722
Bottle Gourd	0.280645	0.361194	0.0583587	645		0.0612903	0.15	0.00590973	650		0.161994	0.298883	0.002	679		0.0599369	0.19943	<0.001	668		0.224784	0.36	0.00558039	722
Eggplant	0.0645161	0.152239	0.00627167	645		0.0709677	0.155882	0.0231968	650		0.115265	0.407821	<0.001	679		0.119874	0.259259	<0.001	668		0.210375	0.36	<0.001	722
Papaya	0.0709677	0.113433	0.114844	645		0.103226	0.179412	0.0238247	650		0.105919	0.234637	<0.001	679		0.11041	0.250712	<0.001	668		0.201729	0.301333	0.00509967	722
Pumpkin (red)	0.119355	0.214925	0.0156168	645		0.0548387	0.129412	0.0153809	650		0.137072	0.276536	0.002	679		0.107256	0.239316	<0.001	668		0.204611	0.296	0.0233247	722
Snake Gourd	0.0806452	0.349254	<0.001	645		0.232258	0.279412	0.210093	650		0.102804	0.293296	<0.001	679		0.113565	0.19943	0.00868111	668		0.167147	0.237333	0.0421384	722
Okra	0.0774194	0.349254	<0.001	645		0.0774194	0.302941	<0.001	650		0.0903427	0.301676	<0.001	679		0.0946372	0.22792	<0.001	668		0.170029	0.24	0.0697502	722
Yardlong bean						0.112903	0.311765	<0.001	650		0.0996885	0.315642	<0.001	679		0.113565	0.25641	<0.001	668		0.224784	0.322667	0.0461195	722
Tomato						0.0193548	0.0676471	0.0171901	650		0.0654206	0.304469	<0.001	679		0.0504732	0.17094	<0.001	668		0.146974	0.245333	0.00882364	722
Red Amaranth	0.0935484	0.453731	<0.001	645		0.0419355	0.167647	<0.001	650		0.0654206	0.354749	<0.001	679		0.0315457	0.150997	<0.001	668		0.0662824	0.149333	<0.001	722
Kangkong	0.0548387	0.420896	<0.001	645		0.0225806	0.282353	<0.001	650		0.0311526	0.307263	<0.001	679		0.022082	0.0968661	<0.001	668		0.0432277	0.128	0.001	722
Bitter Gourd	0.0129032	0.250746	<0.001	645		0.0129032	0.214706	<0.001	650		0.0155763	0.189944	<0.001	679		0.00946372	0.105413	<0.001	668		0.0576369	0.130667	0.002	722
Sweet Potato (orange)	0.00322581	0.0208955	0.0966192	645		0.0129032	0.173529	<0.001	650		0.00311526	0.321229	<0.001	679		0.00315457	0.213675	<0.001	668		0.0172911	0.104	<0.001	722
Only winter seasons
Brown mustard						0.102719	0.196629	0.0186947	687		0.153846	0.339888	<0.001	681		0.105919	0.2	0.0118991	671
White Radish						0.0996979	0.373596	<0.001	687		0.135385	0.449438	<0.001	681		0.0872274	0.18	0.00673249	671
Cauliflower						0.021148	0.0674157	0.0228963	687		0.00923077	0.174157	<0.001	681		0.0155763	0.0542857	0.0268351	671
Cabbage						0.021148	0.162921	<0.001	687		0.0123077	0.213483	<0.001	681		0.00623053	0.0314286	0.0385412	671
Spinach						0.0241692	0.205056	<0.001	687		0.00923077	0.207865	<0.001	681		0.00311526	0.0428571	0.004	671
Carrot						0	0.0870787	<0.001	687		0.00615385	0.188202	<0.001	681		0.00311526	0.0257143	0.0380414	671
Kohlrabi						0.0120846	0.132022	<0.001	687		0.00307692	0.168539	<0.001	681		0	0.0257143	0.0236379	671
The FAARM trial was undertaken in Habiganj District, Sylhet Division, Bangladesh. FAARM: Food and Agricultural Approaches to Reducing Malnutrition.
